# Supplementary material for: Mixed growth of Salix species can promote phosphate-solubilizing bacteria in the roots and rhizosphere
Source: Front Microbiol. 2022 Oct 20;13:1006722. doi: 10.3389/fmicb.2022.1006722 (PMC9634750; doi:10.3389/fmicb.2022.1006722)
Supplement: Supplementary file 1 [file Data_Sheet_1.docx]

**Mixed growth of *Salix* species can promote phosphate-solubilizing bacteria in roots and rhizosphere**

Piotr Koczorski1, Bliss Ursula Furtado1, Marcin Gołębiewski2,3, Piotr Hulisz6, Dominika Thiem1, Christel Baum4, Martin Weih5, Katarzyna Hrynkiewicz1*

1Department of Microbiology, Faculty of Biological and Veterinary Sciences, Nicolaus Copernicus University, Torun, Poland

2Department of Plant Physiology and Biotechnology, Faculty of Biological and Veterinary Sciences, Nicolaus Copernicus University, Torun, Poland

3Interdisciplinary Center for Modern Technologies, Nicolaus Copernicus University, Torun, Poland

4Soil Science, Faculty of Agricultural and Environmental Sciences, University of Rostock, Rostock, Germany

5Department of Crop Production Ecology, Swedish University of Agricultural Sciences, Ullsväg 16, 75007, Uppsala, Sweden

6Department of Soil Science and Landscape Management, Faculty of Earth Sciences and Spatial Management, Nicolaus Copernicus University, Torun, Poland

**Table A** Characterization of bacteria present in microbiome analysis on genus level.

| **Bacteria genus** | **Group** | **Source of isolation** | **Potential function** | **References** |
| --- | --- | --- | --- | --- |
| *Gaiella* | ND | Deep mineral water | Acid and Alkaline phospohatese activity | Albuquerque et al., 2011 |
| *Flavobacterium* | Rhizosphere/ endophyte | Rhizosphere e.g. soybean/ maze roots | Intracellular α-gal, α -glu and α-glu activities.  Catalase- and oxidase-positive  Nitrogene fixation | Mawdsley, & Burns 1994  Madhaiyan et al., 2010  Gao et al., 2015 |
| *Actinoplanes* | rhizosphere | Rhizopshere of coconut tree | Cellulase production | Luo et al., 2021 |
| *Lechevalieria* | Soil | Desert soil | Catalase production, acid production from various substanes (e.g. Lactose, Mannitol, Mannose, Salicin, Trechalose) | Okoro et al., 2010 |
| *Streptomyces* | Rhizosphere/ Endophytes | Rhizosphere of Thai medicin plants and wheat/ Wheat seeds | Antifungal, P solubilization | Khamna et al., 2009  Jog et al., 2014  Cao et al., 2004 |
| *Mycobacterium* | Rhizosphere | Rhizosphere of Barley | Mineralization of Pyrene | Egamberdieva 2012 |
| *Pseudoarthrobacter* | Soil | Crop fields | Biodegradation of syntetic dyes | Stedel et al., 2019 |
| *Nocardioides* | Soil | Sandy soil | Casein,Tweens 20, 40 and 80 degradation and Alkaline phosphatase activity | Roh et al., 2020 |
| *Bradyrhizobium* | Endophyte | Roots of Sorghum | Nitrogene fixation | Hara et al., 2019 |
| *Bacillus* | Rhizosphere | Wheat rhizosphere | Antifungal properties,production of IAA and ACC deaminase, P solubilization and | Cherif-Silini et al., 2016 |

**Table B** P solubilizing bacterial identification table with Accession numbers. S- Sweden, G- Germany, L – Loden, T – Tora, LT – mixture, E – endophyte, R – rhizosphere bacteria

| **Symbol** | **Identified as** | **Country** | **Genotype** | **Place of isolation** | **Accession number** |
| --- | --- | --- | --- | --- | --- |
| B1 | *Lelliottia amnigena* | S | L | R | OP102593 |
| B2 | *Rahnella aquatilis* | S | L | R | OP102594 |
| B3 | *Rahnella aquatilis* | S | T | R | OP102595 |
| B4 | *Enterobacter aerogenes* | S | L | E | OP102596 |
| B5 | *Rahnella variigena* | S | L | E | OP102597 |
| B6 | *Serratia* sp. | S | L | E | OP102598 |
| B7 | *Rahnella aquatilis* | S | L | E | OP102599 |
| B8 | *Pseudomonas mandelii* | S | L | E | OP102600 |
| B9 | *Pseudomonas frederiksbergensis* | G | L | R | OP102601 |
| B10 | *Erwinia* sp. | G | L | R | OP102602 |
| B11 | *Streptomyces* sp. | G | L | R | OP102603 |
| B12 | *Erwinia billingiae* | G | L | R | OP102604 |
| B13 | *Erwinia* sp. | G | L | R | OP102605 |
| B14 | *Phyllobacterium myrsinacearum* | G | L | R | OP102606 |
| B15 | *Bacillus mycoides* | G | T | R | OP102607 |
| B16 | *Curtobacterium flaccumfaciens* | G | T | R | OP102608 |
| B17 | *Paraburkholderia hospita* | G | T | R | OP102609 |
| B18 | *Paraburkholderia hospita* | G | T | R | OP102610 |
| B19 | *Bacillus aryabhattai* | G | L | E | OP102611 |
| B20 | *Paenibacillus* sp. | G | T | E | OP102612 |
| B21 | *Pseudomonas* sp. | G | T | E | OP102613 |
| B22 | *Erwinia billingiae* | G | T | E | OP102614 |
| B23 | *Pantoea agglomerans* | G | T | E | OP102615 |
| B24 | *Erwinia* sp. | G | T | E | OP102616 |
| B25 | *Erwinia billingiae* | G | T | E | OP102617 |
| B26 | *Erwinia aphidicola* | G | LT | E | OP102618 |
| B27 | *Bacillus megaterium* | G | L | E | OP102619 |
| B28 | *Bacillus megaterium* | G | L | E | OP102620 |
| B29 | *Erwinia billingiae* | G | LT | R | OP102621 |
| B30 | *Acinetobacter* sp. | G | LT | R | OP102622 |
| B31 | *Rhizobium* sp. | G | LT | R | OP102623 |
| B32 | *Pseudomonas* sp. | G | T | E | OP102624 |
| B33 | *Caballeronia arationis* | G | T | R | OP102625 |
| B34 | *Bacillus megaterium* | G | L | E | OP102626 |
| B35 | *Erwinia billingiae* | G | T | E | OP102627 |
| B36 | *Pantoea* sp. | G | T | E | OP102628 |
| B37 | *Pseudomonas sp.* | S | LT | E | OP102629 |
| B38 | *Cedecea* sp. | G | LT | R | OP102630 |
| B39 | *Enterobacteriaceae bacterium* | G | LT | R | OP102631 |
| B40 | *Dyella japonica* | S | LT | R | OP102632 |
| B41 | *Erwinia* sp. | G | LT | R | OP102633 |
| B42 | *Paenarthrobacter* sp. | G | L | R | OP102634 |
| B43 | *Curtobacterium* sp. | G | LT | R | OP102635 |
| B44 | *Caballeronia glathei* | G | LT | R | OP102636 |
| B45 | *Rhizobium* sp. | G | L | R | OP102637 |
| B46 | *Paraburkholderia hospita* | G | LT | R | OP102638 |
| B47 | *Rahnella aquatilis* | S | LT | R | OP102639 |
| B48 | *Erwinia* sp. | G | T | E | OP102640 |
| B49 | *Pseudomonas* sp. | S | LT | E | OP102641 |
| B50 | *Pantoea agglomerans* | G | T | E | OP102642 |
| B51 | *Paraburkholderia caledonica* | G | LT | R | OP102643 |
| B52 | *Ralstonia* sp. | G | LT | R | OP102644 |
| B53 | *Erwinia* sp. | G | LT | R | OP102645 |
| B54 | *Ralstonia* sp. | G | LT | R | OP102646 |
| B55 | *Erwinia* sp. | G | LT | R | OP102647 |
| B56 | *Paraburkholderia* sp. | G | LT | R | OP102648 |
| B57 | *Rahnella aquatilis* | S | L | E | OP102649 |
| B58 | *Rhizobium* sp. | G | LT | E | OP102650 |
| B59 | *Bacteroidetes bacterium* | G | LT | R | OP102651 |
| B60 | *Rahnella* sp. | S | LT | E | OP102652 |
| B61 | *Lelliottia amnigena* | S | T | E | OP102653 |
| B62 | *Rahnella* sp. | S | L | E | OP102654 |
| B63 | *Pseudomonas graminis* | S | LT | E | OP102655 |
| B64 | *Rahnella aquatilis* | S | LT | E | OP102656 |
| B65 | *Serratia* sp. | S | LT | E | OP102657 |
| B66 | *Staphylococcus epidermidis* | S | LT | E | OP102658 |
| B67 | *Pseudomonas salomonii* | S | LT | E | OP102659 |
| B68 | *Bacillus* sp. | S | LT | R | OP102660 |
| B69 | *Paraburkholderia ginsengisoli* | S | LT | R | OP102661 |
| B70 | *Pseudomonas* sp. | S | LT | R | OP102662 |
| B71 | *Pseudomonas* sp. | S | LT | R | OP102663 |
| B72 | *Rahnella aquatilis* | S | LT | R | OP102664 |
| B73 | *Phyllobacterium ifriqiyense* | S | LT | R | OP102665 |
| B74 | *Phyllobacterium* sp. | S | LT | R | OP102666 |
| B75 | *Erwinia* sp. | G | LT | E | OP102667 |
| B76 | *Mitsuaria* sp. | G | LT | E | OP102668 |
| B77 | *Curtobacterium* sp. | G | T | R | OP102669 |
| B78 | *Pseudomonas* sp. | S | T | E | OP102670 |
| B79 | *Pseudomonas* sp. | S | T | E | OP102671 |
| B80 | *Lelliottia amnigena* | S | T | E | OP102672 |
| B81 | *Erwinia* sp. | S | T | R | OP102673 |
| B82 | *Erwinia* sp. | S | T | R | OP102674 |
| B83 | *Erwinia* sp. | S | T | R | OP102675 |
| B84 | *Enterobacteriaceae bacterium* | G | LT | R | OP102676 |
| B85 | *Rhizobium lusitanum* | G | LT | R | OP102677 |
| B86 | *Enterobacteriaceae bacterium* | S | L | E | OP102678 |
| B87 | *Lelliottia* sp. | S | T | E | OP102679 |
| B88 | *Serratia* sp. | S | LT | E | OP102680 |

**References**

Albuquerque, L., França, L., Rainey, F.A., Schumann, P., Nobre, M.F. and da Costa, M.S., 2011. Gaiella occulta gen. nov., sp. nov., a novel representative of a deep branching phylogenetic lineage within the class Actinobacteria and proposal of Gaiellaceae fam. nov. and Gaiellales ord. nov. *Systematic and applied microbiology*, *34*(8), pp.595-599.

Cao, L., Qiu, Z., You, J., Tan, H. and Zhou, S., 2004. Isolation and characterization of endophytic Streptomyces strains from surface‐sterilized tomato (Lycopersicon esculentum) roots. *Letters in applied microbiology*, *39*(5), pp.425-430.

Cătălina, S., Catalina, E.R. and Maria, R.C., 2019. Biodegradation of synthetic dyes by some bacterial strains isolated from soil. *Lucrări Ştiinţifice, Universitatea de Ştiinţe Agricole Şi Medicină Veterinară" Ion Ionescu de la Brad" Iaşi, Seria Horticultură*, *62*(1), pp.201-208.

Cherif-Silini, H., Silini, A., Yahiaoui, B., Ouzari, I. and Boudabous, A., 2016. Phylogenetic and plant-growth-promoting characteristics of Bacillus isolated from the wheat rhizosphere. *Annals of Microbiology*, *66*(3), pp.1087-1097.

Egamberdieva, D., 2012. Colonization of Mycobacterium phlei in the rhizosphere of wheat grown under saline conditions. *Turkish Journal of Biology*, *36*(5), pp.487-492.

Gao, J.L., Lv, F.Y., Wang, X.M., Yuan, M., Li, J.W., Wu, Q.Y. and Sun, J.G., 2015. Flavobacterium endophyticum sp. nov., a nifH gene-harbouring endophytic bacterium isolated from maize root. *International Journal of Systematic and Evolutionary Microbiology*, *65*(Pt_11), pp.3900-3904.

Hara, S., Morikawa, T., Wasai, S., Kasahara, Y., Koshiba, T., Yamazaki, K., Fujiwara, T., Tokunaga, T. and Minamisawa, K., 2019. Identification of nitrogen-fixing Bradyrhizobium associated with roots of field-grown sorghum by metagenome and proteome analyses. *Frontiers in microbiology*, *10*, p.407.

Jog, R., Pandya, M., Nareshkumar, G. and Rajkumar, S., 2014. Mechanism of phosphate solubilization and antifungal activity of Streptomyces spp. isolated from wheat roots and rhizosphere and their application in improving plant growth. *Microbiology*, *160*(4), pp.778-788.

Khamna, S., Yokota, A., Peberdy, J.F. and Lumyong, S., 2009. Antifungal activity of Streptomyces spp. isolated from rhizosphere of Thai medicinal plants. *International Journal of Integrative Biology*, *6*(3), pp.143-147.

Luo, X., Sun, X., Huang, Z., He, C., Zhao, J., Xiang, W., Song, J. and Wang, X., 2021. Actinoplanes flavus sp. nov., a novel cellulase-producing actinobacterium isolated from coconut palm rhizosphere soil. *International Journal of Systematic and Evolutionary Microbiology*, *71*(9), p.004990.

Madhaiyan, M., Poonguzhali, S., Lee, J.S., Lee, K.C. and Sundaram, S., 2010. Flavobacterium glycines sp. nov., a facultative methylotroph isolated from the rhizosphere of soybean. *International Journal of Systematic and Evolutionary Microbiology*, *60*(9), pp.2187-2192.

Mawdsley, J.L. and Burns, R.G., 1994. Inoculation of plants with a Flavobacterium species results in altered rhizosphere enzyme activities. *Soil Biology and Biochemistry*, *26*(7), pp.871-882.

Okoro, C.K., Bull, A.T., Mutreja, A., Rong, X., Huang, Y. and Goodfellow, M., 2010. Lechevalieria atacamensis sp. nov., Lechevalieria deserti sp. nov. and Lechevalieria roselyniae sp. nov., isolated from hyperarid soils. *International journal of systematic and evolutionary microbiology*, *60*(2), pp.296-300.

Roh, S.G., Lee, C., Kim, M.K., Kang, H.J., Kim, Y.S., Kim, M.J., Malik, A. and Kim, S.B., 2020. Nocardioides euryhalodurans sp. nov., Nocardioides seonyuensis sp. nov. and Nocardioides eburneiflavus sp. nov., isolated from soil. *International Journal of Systematic and Evolutionary Microbiology*, *70*(4), pp.2682-2689.
